# Supplementary material
Source: Springer Nature journal article supplement (https://www.springermedizin.de/resource/supplementary/12889_2010_2856_MOESM1_ESM.pdf/9487462)
Supplement: MOESM1 [file 9487462]

## Condition

## Personal feedback

SeqBT<sup>1</sup>  
condition

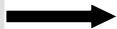

Health risk  
appraisal

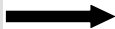

Personal advice  
about only one  
self-selected unhealthy  
lifestyle behaviour

SimBT<sup>2</sup>  
condition

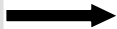

Health risk  
appraisal

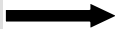

Personal advice  
about all  
unhealthy  
lifestyle behaviours

Control  
condition

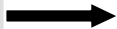

Health risk  
appraisal

<sup>1</sup> Sequential Behaviour Tailoring; <sup>2</sup> Simultaneous Behaviour Tailoring
